# Supplementary material for: Lignocellulosic biomass valorisation: a review of feedstocks, processes and potential value chains and their implications for the decision-making process
Source: Royal Society of Chemistry journal article supplement (doi:10.1039/d4su00342j), 2024-01-01
Supplement: d4su00342j1.pdf [file d4su00342j1.pdf]

# ESI: Lignocellulosic biomass valorisation: A review of feedstocks, processes and potential value chains, and their implications for the decision-making process

Britt Segers,<sup>a</sup> Philippe Nimmegeers,<sup>a,b,c</sup> Marc Spiller,<sup>d,e,f</sup> Giorgio Tofani,<sup>g</sup> Edita Jasiukaitytė-Grojzdek,<sup>g</sup> Elina Dace,<sup>h,i</sup> Timo Kikas,<sup>j</sup> Jorge M. Marchetti,<sup>k</sup> Milena Rajić,<sup>l</sup> Güray Yildiz<sup>m</sup> and Pieter Billen<sup>\*a,e</sup>

<sup>a</sup>Intelligence in Processes, Advanced Catalysts and Solvents (IPRACS), Faculty of Applied Engineering, University of Antwerp, Groenenborgerlaan 171, 2020 Antwerp, Belgium.

<sup>b</sup>Environmental Economics (EnvEcon), Department of Engineering Management, Faculty of Business and Economics, University of Antwerp, Prinsstraat 13, 2000 Antwerp, Belgium.

<sup>c</sup>Flanders Make@UAntwerp, 2000 Antwerp, Belgium.

<sup>d</sup>Biobased Sustainability Engineering (SUSTAIN), Department of Bioscience Engineering, University of Antwerp, 2020 Antwerpen, Belgium.

<sup>e</sup>Centre for Advanced Process Technology for Urban Resource Recovery (CAPTURE), Frieda Saeystraat 1, 9052 Gent, Belgium.

<sup>f</sup>VITO WaterClimateHub, Wetenschapspark 1, 8400 Oostende, Belgium.

<sup>g</sup>Department of Catalysis and Chemical Reaction Engineering, National Institute of Chemistry, Hajdrihova 19, 1000 Ljubljana, Slovenia.

<sup>h</sup>Baltic Studies Centre, Kokneses prospekts 26-2, Riga LV-1014, Latvia.

<sup>i</sup>Institute of Microbiology and Biotechnology, University of Latvia, Jelgavas iela 1, Riga, LV-1004, Latvia B

<sup>j</sup>Biosystems Engineering, Institute of Forestry and Engineering, Estonian University of Life Sciences, Kreutzwaldi 56, Tartu, 51014, Estonia.

<sup>k</sup>Faculty of Science and Technology, Norwegian University of Life Sciences, Drøbakveien 31, 1432 Ås, Norway.

<sup>l</sup>Department of Management in Mechanical Engineering, Faculty of Mechanical Engineering, University of Niš, Aleksandra Medvedeva 14, 18000 Niš, Serbia.

<sup>m</sup>Department of Materials Engineering and Production, Faculty of Mechanical Engineering, Białystok University of Technology, Wiejska 45C, 15-351 Białystok, Poland.

\*Corresponding Author at: <sup>1</sup>Intelligence in Processes, Advanced Catalysts and Solvents (IPRACS), Faculty of Applied Engineering, University of Antwerp, Groenenborgerlaan 171, 2020 Antwerp, Belgium.

## SUPPLEMENTARY DATA

Table S1 Composition lignocellulosic biomass for grasses (lower and upper limits of the ranges for each subtype are determined by the average of the minimum and maximum values found in the literature)

|                                       | References | Cellulose   |             | Hemicellulose |             | Lignin      |             |
|---------------------------------------|------------|-------------|-------------|---------------|-------------|-------------|-------------|
|                                       |            | Lower limit | Upper limit | Lower limit   | Upper limit | Lower limit | Upper limit |
| Giant Reed<br>( <i>Arundo donax</i> ) | 1          | 36 %        | 40 %        | 29 %          | 42 %        | 17 %        | 19 %        |
| Corn stalk                            | 1, 2       | 34 %        | 40 %        | 17 %          | 42 %        | 7 %         | 14 %        |
| Corn cob                              | 2-4        | 34 %        | 45 %        | 31.9 %        | 39 %        | 6 %         | 15 %        |
| Corn stover                           | 3-6        | 35 %        | 40 %        | 21 %          | 26 %        | 7 %         | 19 %        |
| Corn leaves                           | 3          | 27 %        | 27 %        | 13 %          | 13 %        | 15 %        | 15 %        |
| Switch grass                          | 2-4, 6, 7  | 5 %         | 45 %        | 23 %          | 50 %        | 6 %         | 40 %        |
| Pennisetum                            | 1          | 41 %        | 42 %        | 22 %          | 23 %        | 17 %        | 19 %        |
| Silvergrass                           | 1          | 43 %        | 44 %        | 26 %          | 29 %        | 17 %        | 18 %        |
| Wheat straw                           | 2-4, 6, 7  | 9 %         | 39 %        | 22 %          | 50 %        | 12 %        | 26 %        |
| Wheat bran                            | 2          | 9 %         | 12 %        | 39 %          | 39 %        | 3 %         | 5 %         |
| Barley straw                          | 2, 3       | 31 %        | 41 %        | 22 %          | 38 %        | 6 %         | 19 %        |
| Barley husk                           | 2          | 39 %        | 39 %        | 12 %          | 12 %        | 22 %        | 22 %        |
| Canola straw                          | 2          | 44 %        | 44 %        | 6 %           | 6 %         | 15 %        | 15 %        |
| Oat straw                             | 2, 3       | 31 %        | 39 %        | 23 %          | 38 %        | 4 %         | 24 %        |
| Rice husk                             | 2, 3       | 17 %        | 35 %        | 18 %          | 38 %        | 20 %        | 31 %        |

|                  |      |      |      |      |      |      |      |
|------------------|------|------|------|------|------|------|------|
| Rice straw       | 2-4  | 20 % | 40 % | 19 % | 50 % | 2 %  | 18 % |
| Rice bran        | 2    | 34 % | 34 % | 28 % | 28 % | 25 % | 25 % |
| Rye straw        | 2, 3 | 33 % | 38 % | 27 % | 31 % | 16 % | 31 % |
| Rye bran         | 2    | 5 %  | 6 %  |      |      | 4 %  | 4 %  |
| Soybean stalks   | 2    | 35 % | 35 % | 25 % | 25 % | 20 % | 20 % |
| Soybean straw    | 2    | 52 % | 52 % | 10 % | 10 % | 10 % | 10 % |
| Spelt straw      | 2    | 38 % | 38 % | 24 % | 24 % | 15 % | 15 % |
| Sunflower stalks | 2    | 39 % | 42 % | 30 % | 34 % | 13 % | 18 % |
| Bamboo           | 3    | 40 % | 40 % | 19 % | 19 % | 21 % | 21 % |
| Miscantus        | 3    | 38 % | 40 % | 18 % | 24 % | 24 % | 25 % |

26

27  
28

Table S2 Composition lignocellulosic biomass for softwoods (lower and upper limits of the ranges for each subtype are determined by the average of the minimum and maximum values found in the literature)

|                    | References | Cellulose   |             | Hemicellulose |             | Lignin      |             |
|--------------------|------------|-------------|-------------|---------------|-------------|-------------|-------------|
|                    |            | Lower limit | Upper limit | Lower limit   | Upper limit | Lower limit | Upper limit |
| Pine wood          | 3, 5, 8, 9 | 38 %        | 50 %        | 19 %          | 22 %        | 21 %        | 29 %        |
| P. Armandii Franch | 3          | 48 %        | 48 %        | 18 %          | 18 %        | 24 %        | 24 %        |
| Spruce             | 3          | 43 %        | 43 %        | 29 %          | 29 %        | 28 %        | 28 %        |
| Japanese Cedar     | 3          | 39 %        | 39 %        | 23 %          | 23 %        | 34 %        | 34 %        |
| Fir                | 3          | 45 %        | 45 %        | 22 %          | 22 %        | 30 %        | 30 %        |

29

30  
31

Table S3 Composition lignocellulosic biomass for hardwoods (lower and upper limits of the ranges for each subtype are determined by the average of the minimum and maximum values found in the literature)

|                                    | References | Cellulose   |             | Hemicellulose |             | Lignin      |             |
|------------------------------------|------------|-------------|-------------|---------------|-------------|-------------|-------------|
|                                    |            | Lower limit | Upper limit | Lower limit   | Upper limit | Lower limit | Upper limit |
| Maple (Acer Rubrum)                | 7          | 43 %        | 43 %        | 17 %          | 17 %        | 25 %        | 25 %        |
| Sweetgum (Liquidambar Styraciflua) | 7          | 40 %        | 40 %        | 19 %          | 19 %        | 25 %        | 25 %        |
| Eucalyptus (Eucalyptus Nitens)     | 5, 7       | 44 %        | 48 %        | 11 %          | 17 %        | 25 %        | 29 %        |
| Poplar                             | 3, 8, 9    | 40 %        | 49 %        | 17 %          | 24 %        | 15 %        | 28 %        |
| Vineyard                           | 8          | 34 %        | 34 %        | 18 %          | 18 %        | 25 %        | 25 %        |
| Beech                              | 3          | 45 %        | 45 %        | 30 %          | 30 %        | 20 %        | 20 %        |
| Aspen                              | 3          | 53 %        | 53 %        | 22 %          | 22 %        | 20 %        | 20 %        |
| Cherry wood                        | 3          | 46 %        | 46 %        | 29 %          | 29 %        | 18 %        | 18 %        |
| Willow                             | 3          | 42 %        | 42 %        | 17 %          | 17 %        | 29 %        | 29 %        |
| Birch (Betula Pendula)             | 10         | 44 %        | 44 %        | 29 %          | 29 %        |             |             |

32

33  
34

Table S4 Composition lignocellulosic biomass for secondary streams (lower and upper limits of the ranges for each subtype are determined by the average of the minimum and maximum values found in the literature)

|                       | References | Cellulose   |             | Hemicellulose |             | Lignin      |             |
|-----------------------|------------|-------------|-------------|---------------|-------------|-------------|-------------|
|                       |            | Lower limit | Upper limit | Lower limit   | Upper limit | Lower limit | Upper limit |
| Sugarcane bagasse     | 2-4, 7     | 37 %        | 48 %        | 19 %          | 30 %        | 19 %        | 42 %        |
| Sweet sorghum bagasse | 3, 4       | 34 %        | 45 %        | 18 %          | 27 %        | 14 %        | 21 %        |
| Sugar beet pulp       | 2          | 22 %        | 22 %        | 30 %          | 30 %        | 4 %         | 4 %         |
| Apple pomace          | 2          | 48 %        | 48 %        | 28 %          | 28 %        | 15 %        | 22 %        |
| Grape pomace          | 2          | 9 %         | 15 %        | 4 %           | 10 %        | 12 %        | 41 %        |
| Brewer's spent grain  | 2          | 12 %        | 40 %        | 28 %          | 40 %        | 12 %        | 28 %        |
| Flax oil cake         | 2          | 8 %         | 8 %         | 5 %           | 5 %         | 6 %         | 6 %         |
| Hemp oil cake         | 2          | 23 %        | 23 %        | 14 %          | 14 %        | 17 %        | 17 %        |

2

|                            |    |      |      |      |      |      |      |
|----------------------------|----|------|------|------|------|------|------|
| Hull-less pumpkin oil cake | 2  | 4 %  | 4 %  | 7 %  | 7 %  | 1 %  | 1 %  |
| Olive mill waste           | 2  | 25 % | 34 % | 13 % | 16 % | 13 % | 16 % |
| Rapeseed cake              | 2  | 16 % | 16 % | 13 % | 13 % | 7 %  | 7 %  |
| Hazelnut shell             | 3  | 25 % | 25 % | 28 % | 28 % | 42 % | 42 % |
| Palm oil shell             | 11 | 22 % | 22 % | 24 % | 24 % | 54 % | 54 % |
| Jatropha Curcas shell      | 11 | 61 % | 61 % | 18 % | 18 % | 21 % | 21 % |

35

## 36 REFERENCES

- 37 1. L. Kou, Y. Song, X. Zhang and T. Tan, *Bioresource Technology*, 2017, **241**, 424-429.
- 38 2. M. Tišma, M. Bucić-Kojić and M. Planinić, *Chemical and Biochemical Engineering Quarterly*, 2021, **35**, 139-156.
- 39 3. M. Tayyab, A. Noman, W. Islam, S. Waheed, Y. Arafat, F. Ali, M. Zaynab, S. Lin, H. Zhang and W. Lin, *Appl. Ecol. Environ. Res.*, 2018, **16**, 225-249.
- 40 4. Z. Anwar, M. Gulfraz and M. Irshad, *Journal of Radiation Research and Applied Sciences*, 2014, **7**, 163-173.
- 41 5. E. W. Qian, in *Research Approaches to Sustainable Biomass Systems*, eds. S. Tojo and T. Hirasawa, Academic Press, Boston, 2014, DOI: <https://doi.org/10.1016/B978-0-12-404609-2.00007-6>, pp. 181-204.
- 42 6. J. N. Putro, F. E. Soetaredjo, S.-Y. Lin, Y.-H. Ju and S. Ismadji, *RSC advances*, 2016, **6**, 46834-46852.
- 43 7. W. Geng, R. Narron, X. Jiang, J. J. Pawlak, H.-m. Chang, S. Park, H. Jameel and R. A. Venditti, *Cellulose*, 2019, **26**, 3219-3230.
- 44 8. C. K. Nitsos, T. Choli-Papadopoulou, K. A. Matis and K. S. Triantafyllidis, *ACS Sustainable Chemistry & Engineering*, 2016, **4**, 4529-4544.
- 45 9. H. Wang, J. Male and Y. Wang, *ACS Catalysis*, 2013, **3**, 1047-1070.
- 46 10. P. Das, Itä-Suomen yliopisto, 2019.
- 47 11. C. Gutiérrez-Antonio, A. G. Romero-Izquierdo, F. I. Gómez-Castro and S. Hernández, in *Production Processes of Renewable Aviation Fuel*, eds. C. Gutiérrez-Antonio, A. G. Romero-Izquierdo, F. I. Gómez-Castro and S. Hernández, Elsevier, 2021, DOI: <https://doi.org/10.1016/B978-0-12-819719-6.00005-5>, pp. 129-169.

53
